# Supplementary material
Source: MDPI journal article supplement (https://www.mdpi.com/2306-5710/7/3/55)
Supplement: s1 [file s1]

Supplementary Material

# Transcriptomic Response of *L. Monocytogenes* to Co-Culture with *S. Cerevisiae*

Spiros Paramithiotis \*, Alexandra Katidi and Eleftherios H. Drosinos

Laboratory of Food Quality Control and Hygiene, Department of Food Science and Human Nutrition, Agricultural University of Athens, Iera Odos 75, 11855 Athens, Greece; alexandra\_katidi@hotmail.com (A.K.); ehd@aua.gr (E.H.D.)

\* Correspondence: sdp@aua.gr

**Table S1.** Primer sequences, amplicon sizes, and PCR conditions used for the gene transcription assay.

| Genes       | Primer Sequence                            | Concentration (μM) | Amplicon Size (bp) | PCR Efficiency |
|-------------|--------------------------------------------|--------------------|--------------------|----------------|
| IGS         | IGS_f: GGCCTATAGCTCAGCTGGTTA               | 1.2                | 135                | 2.03           |
|             | IGS_r: GCTGAGCTAAGGCCCGTAAA                | 1.2                | -                  | -              |
| <i>rpob</i> | <i>rpob</i> _f: CCGCGATGCGAAAACAAT         | 0.9                | 69                 | 2.04           |
|             | <i>rpob</i> _r: CCWACAGAGATACGGTTATCRAATGC | 0.9                | -                  | -              |
| 16S         | 16S_f: GATGCATAGCCGACCTGAGA                | 0.9                | 114                | 2.05           |
|             | 16S_r: CTCCGTCAGACTTTCGTCCA                | 0.9                | -                  | -              |
| <i>prfA</i> | <i>prfA</i> _f: CTATTTGCGGTCAACTTTTAATCCT  | 0.9                | 100                | 2.09           |
|             | <i>prfA</i> _r: CCTAACTCCTGCATTGTAAATTATCC | 0.9                | -                  | -              |
| <i>sigB</i> | <i>sigB</i> _f: CCAAGAAAATGGCGATCAAGAC     | 1.2                | 166                | 2.13           |
|             | <i>sigB</i> _r: CGTTGCATCATATCTTCTAATAGCT  | 1.2                | -                  | -              |
| <i>hly</i>  | <i>hly</i> _f: TACATTAGTGGAAGATGG          | 1.2                | 153                | 1.98           |
|             | <i>hly</i> _r: ACATTCAAGCTATTATTACA        | 1.2                | -                  | -              |
| <i>plcA</i> | <i>plcA</i> _f: CTAGAAGCAGGAATACGGTACA     | 1.2                | 115                | 1.94           |
|             | <i>plcA</i> _r: ATTGAGTAATCGTTTCTAAT       | 1.2                | -                  | -              |
| <i>plcB</i> | <i>plcB</i> _f: CAGGCTACCACTGTGCATATGAA    | 0.9                | 72                 | 2.00           |
|             | <i>plcB</i> _r: CCATGTCTTCYGTGCTTGATAATTG  | 0.9                | -                  | -              |
| <i>inlA</i> | <i>inlA</i> _f: AATGCTCAGGCAGCTACAMTTACA   | 0.9                | 114                | 2.12           |
|             | <i>inlA</i> _r: CGTGTCTGTTACRTTCGTTTTTCC   | 0.9                | -                  | -              |
| <i>inlB</i> | <i>inlB</i> _f: AAGCAMGATTTTCATGGGAGAGT    | 0.9                | 78                 | 2.04           |
|             | <i>inlB</i> _r: TTACCGTTCCATCAACATCATAACTT | 0.9                | -                  | -              |
| <i>inlC</i> | <i>inlC</i> _f: ACTGGTCAGAAATGTGTGAATGA    | 0.9                | 80                 | 2.06           |
|             | <i>inlC</i> _r: CCATCTGGGTCTTTGACAGT       | 0.9                | -                  | -              |
| <i>inlJ</i> | <i>inlJ</i> _f: TCGTAAATGCTCACATCCAAG      | 0.9                | 81                 | 2.03           |
|             | <i>inlJ</i> _r: TTGCCCTTCAGCATCCAAGT       | 0.9                | -                  | -              |

Thermocycling conditions: initial denaturation at 95 °C for 20 s and then 40x (95 °C for 10 s, 60 °C for 30 s, 72 °C for 30 s). Melting curve analysis: 95 °C for 15 s and then 60 °C for 1 min and raised to 95 °C at 0.3 °C/s.
